# Supplementary material for: Application of an Accessible Interface for Pharmacokinetic Modeling and In Vitro to In Vivo Extrapolation
Source: Front Pharmacol. 2022 Apr 13;13:864742. doi: 10.3389/fphar.2022.864742 (PMC9043603; doi:10.3389/fphar.2022.864742)
Supplement: Supplementary file 1 [file Table1.xlsx]

## Sheet: MetaData
Chemical Identifier Descriptions
Substance Name	Name of the chemical/test substance
CASRN	Chemical Abstracts Services Registry Number
DTXSID	Unique chemical identifier in the EPA DSSTox Database. Note not all chemicals have a DTXSID.
QSAR Ready ID	Structural representation of the chemicals in InChiKey format that have been processed and standardized for QSAR modeling. These can be used as an input to run OPERA models (https://github.com/NIEHS/OPERA). Processing steps include: desalting, removal of stereochemistry, and standardizing tautomer (among others). Note that chemicals that cannot be predicted (such as metals, inorganics and mixture…
Worksheet Descriptions
"Query" worksheet contains the summary of the query.
"MetaData" worksheet (this sheet) contains additional information about the fields and the download.
Notes on Data Output
The results may be single values or summarized across all available data for the assay-endpoint. Summarized values have formatting indicating the type of summary presented.
Quantitative values are summarized as mean. Data are presented as: [min-max], n=count of responses, median=median value.
Factor/categorical data are summarized as counts for each level(category). Summarized factor data values are displayed as FactorLevel=count where "FactorLevel" is the category such as "Active", "count" is the count of number of records with that factor level. For example, Active=5 means that there were 5 records where the chemical was active for the assay.
A cell is left blank if no data are available for that chemical /assay pair.

## Sheet: IVIVE Results
Chemical	CASRN	DTXSID	Assay	MOA	Mechanisms	AC50 (uM)	EAD 50th Percentile (mg/kg/dose)	EAD 50th Percentile (mg/kg/day)
2-Chloro-N-phenylacetamide	587-65-5	DTXSID3041409	UPITT_HCI_U2OS_AR_TIF2_Nucleoli_Cytoplasm_Ratio_Antagonist	Androgen Receptor Modulation,KCC8: Receptor Mediated Effects,Steroid Hormone Metabolism	Androgen Metabolic Process,Gene Expression Regulation, Steroid Hormone Nuclear Receptor	27.814	10.781	258.744
2-Chloro-N-phenylacetamide	587-65-5	DTXSID3041409	UPITT_HCI_U2OS_AR_TIF2_Nucleoli_Antagonist	Androgen Receptor Modulation,KCC8: Receptor Mediated Effects,Steroid Hormone Metabolism	Androgen Metabolic Process,Gene Expression Regulation, Steroid Hormone Nuclear Receptor	35.803	13.877	333.048
2-Chloro-N-phenylacetamide	587-65-5	DTXSID3041409	ATG_GRE_CIS_up	Glucocorticoid Metabolic Process,Glucocorticoid Receptor Modulation,KCC8: Receptor Mediated Effects,Steroid Hormone Metabolism	Gene Expression Regulation, Steroid Hormone Nuclear Receptor,Glucocorticoid Metabolic Process	163.651	63.431	1522.34
2-Chloro-N-phenylacetamide	587-65-5	DTXSID3041409	ATG_PPRE_CIS_up	KCC8: Receptor Mediated Effects	Gene Expression Regulation, Fatty Acid Signaling	5.403	2.094	50.256
2-Chloro-N-phenylacetamide	587-65-5	DTXSID3041409	ATG_PPARg_TRANS_up	KCC8: Receptor Mediated Effects	Gene Expression Regulation, Fatty Acid Signaling	2.106	0.816	19.584
2-Chloro-N-phenylacetamide	587-65-5	DTXSID3041409	ATG_VDRE_CIS_up	KCC8: Receptor Mediated Effects,Vitamin D Modulation	Gene Expression Regulation, Steroid Hormone Nuclear Receptor	48.512	18.803	451.272
2-Chloro-N-phenylacetamide	587-65-5	DTXSID3041409	OT_ERa_EREGFP_0480	Estrogen Metabolic Process,Estrogen Receptor Modulation,KCC8: Receptor Mediated Effects,Steroid Hormone Metabolism	Estrogen Metabolic Process,Gene Expression Regulation, Steroid Hormone Nuclear Receptor	83.091	32.206	772.944
2-Chloro-N-phenylacetamide	587-65-5	DTXSID3041409	OT_AR_ARSRC1_0480	Androgen Receptor Modulation,KCC8: Receptor Mediated Effects,Steroid Hormone Metabolism	Androgen Metabolic Process,Gene Expression Regulation, Steroid Hormone Nuclear Receptor	78.269	30.337	728.088
2-Chloro-N-phenylacetamide	587-65-5	DTXSID3041409	OT_AR_ARSRC1_0960	Androgen Receptor Modulation,KCC8: Receptor Mediated Effects,Steroid Hormone Metabolism	Androgen Metabolic Process,Gene Expression Regulation, Steroid Hormone Nuclear Receptor	29.384	11.389	273.336
2-Chloro-N-phenylacetamide	587-65-5	DTXSID3041409	NCCT_TPO_AUR_dn	KCC8: Receptor Mediated Effects,Thyroid Hormone Metabolic Process	Thyroid Hormone Generation	14.523	5.629	135.096
2-Chloro-N-phenylacetamide	587-65-5	DTXSID3041409	ACEA_AR_antagonist_80hr	Androgen Receptor Modulation,KCC8: Receptor Mediated Effects,Steroid Hormone Metabolism	Androgen Metabolic Process,Gene Expression Regulation, Steroid Hormone Nuclear Receptor	12.28	4.76	114.24
2-Chloro-N-phenylacetamide	587-65-5	DTXSID3041409	TOX21_AR_LUC_MDAKB2_Antagonist_10nM_R1881	Androgen Receptor Modulation,KCC8: Receptor Mediated Effects,Steroid Hormone Metabolism	Androgen Metabolic Process,Gene Expression Regulation, Steroid Hormone Nuclear Receptor	37.193	14.416	345.984
2-Chloro-N-phenylacetamide	587-65-5	DTXSID3041409	TOX21_AR_BLA_Antagonist_ratio	Androgen Receptor Modulation,KCC8: Receptor Mediated Effects,Steroid Hormone Metabolism	Androgen Metabolic Process,Gene Expression Regulation, Steroid Hormone Nuclear Receptor	12.1	4.69	112.56
2-Chloro-N-phenylacetamide	587-65-5	DTXSID3041409	TOX21_GR_BLA_Antagonist_ratio	Glucocorticoid Metabolic Process,Glucocorticoid Receptor Modulation,KCC8: Receptor Mediated Effects,Steroid Hormone Metabolism	Gene Expression Regulation, Steroid Hormone Nuclear Receptor,Glucocorticoid Metabolic Process	67.81	26.283	630.792
2-Chloro-N-phenylacetamide	587-65-5	DTXSID3041409	TOX21_ERa_BLA_Antagonist_ratio	Estrogen Metabolic Process,Estrogen Receptor Modulation,KCC8: Receptor Mediated Effects,Steroid Hormone Metabolism	Estrogen Metabolic Process,Gene Expression Regulation, Steroid Hormone Nuclear Receptor	28.701	11.124	266.976
2-Chloro-N-phenylacetamide	587-65-5	DTXSID3041409	TOX21_TR_LUC_GH3_Antagonist	KCC8: Receptor Mediated Effects,Thyroid Hormone Metabolic Process	Gene Expression Regulation, Thyroid Signaling,Thyroid Receptor Modulation	26.203	10.156	243.744
2-Chloro-N-phenylacetamide	587-65-5	DTXSID3041409	TOX21_PPARd_BLA_antagonist_ratio	KCC8: Receptor Mediated Effects	Gene Expression Regulation, Fatty Acid Signaling	17.686	6.855	164.52
2-Chloro-N-phenylacetamide	587-65-5	DTXSID3041409	TOX21_VDR_BLA_antagonist_ratio	KCC8: Receptor Mediated Effects,Vitamin D Modulation	Gene Expression Regulation, Steroid Hormone Nuclear Receptor	20.602	7.985	191.64
2-Chloro-N-phenylacetamide	587-65-5	DTXSID3041409	TOX21_PPARg_BLA_antagonist_ratio	KCC8: Receptor Mediated Effects	Gene Expression Regulation, Fatty Acid Signaling	38.449	14.903	357.672
2-Chloro-N-phenylacetamide	587-65-5	DTXSID3041409	TOX21_RORg_LUC_CHO_Antagonist	KCC8: Receptor Mediated Effects	Gene Expression Regulation, Other Transcription Factors	21.795	8.448	202.752
2-Chloro-N-phenylacetamide	587-65-5	DTXSID3041409	TOX21_AR_LUC_MDAKB2_Antagonist_0.5nM_R1881	Androgen Receptor Modulation,KCC8: Receptor Mediated Effects,Steroid Hormone Metabolism	Androgen Metabolic Process,Gene Expression Regulation, Steroid Hormone Nuclear Receptor	42.963	16.652	399.648
2-Chloro-N-phenylacetamide	587-65-5	DTXSID3041409	TOX21_RAR_LUC_Antagonist	KCC8: Receptor Mediated Effects,Retinoic Acid Receptor Modulation	Gene Expression Regulation, Developmental Signaling	73.266	28.398	681.552
2-Chloro-N-phenylacetamide	587-65-5	DTXSID3041409	TOX21_ERa_LUC_VM7_Antagonist_0.1nM_E2	Androgen Receptor Modulation,KCC8: Receptor Mediated Effects,Steroid Hormone Metabolism	Androgen Metabolic Process,Gene Expression Regulation, Steroid Hormone Nuclear Receptor	59.509	23.066	553.584
2-Chloro-N-phenylacetamide	587-65-5	DTXSID3041409	TOX21_CAR_Antagonist	KCC8: Receptor Mediated Effects	Gene Expression Regulation, Xenobiotic Response	48.323	18.73	449.52
2-Chloro-N-phenylacetamide	587-65-5	DTXSID3041409	TOX21_PGC_ERR_Antagonist	Estrogen Metabolic Process,Estrogen-related Receptor Modulation,KCC8: Receptor Mediated Effects,Steroid Hormone Metabolism	Estrogen Metabolic Process,Gene Expression Regulation, Other Transcription Factors	8.803	3.412	81.888
2-Chloro-N-phenylacetamide	587-65-5	DTXSID3041409	TOX21_ERR_Antagonist	Estrogen Metabolic Process,Estrogen-related Receptor Modulation,KCC8: Receptor Mediated Effects,Steroid Hormone Metabolism	Estrogen Metabolic Process,Gene Expression Regulation, Other Transcription Factors	25.355	9.828	235.872
2-Chloro-N-phenylacetamide	587-65-5	DTXSID3041409	TOX21_PR_BLA_Antagonist_ratio	KCC8: Receptor Mediated Effects,Progesterone Receptor Modulation,Steroid Hormone Metabolism	Gene Expression Regulation, Steroid Hormone Nuclear Receptor,Progesterone Metabolic Process	37.369	14.484	347.616
2-Chloro-N-phenylacetamide	587-65-5	DTXSID3041409	TOX21_ERb_BLA_Antagonist_ratio	Estrogen Metabolic Process,Estrogen Receptor Modulation,KCC8: Receptor Mediated Effects,Steroid Hormone Metabolism	Estrogen Metabolic Process,Gene Expression Regulation, Steroid Hormone Nuclear Receptor	28.937	11.216	269.184
Dodecyltrimethylammonium chloride	112-00-5	DTXSID1026900	TOX21_TR_LUC_GH3_Antagonist	KCC8: Receptor Mediated Effects,Thyroid Hormone Metabolic Process	Gene Expression Regulation, Thyroid Signaling,Thyroid Receptor Modulation	5.666	0.159	3.816
Dodecyltrimethylammonium chloride	112-00-5	DTXSID1026900	TOX21_ERa_LUC_VM7_Antagonist_0.5nM_E2	Estrogen Metabolic Process,Estrogen Receptor Modulation,KCC8: Receptor Mediated Effects,Steroid Hormone Metabolism	Estrogen Metabolic Process,Gene Expression Regulation, Steroid Hormone Nuclear Receptor	24.254	0.682	16.368
Dodecyltrimethylammonium chloride	112-00-5	DTXSID1026900	TOX21_ERa_BLA_Antagonist_ratio	Estrogen Metabolic Process,Estrogen Receptor Modulation,KCC8: Receptor Mediated Effects,Steroid Hormone Metabolism	Estrogen Metabolic Process,Gene Expression Regulation, Steroid Hormone Nuclear Receptor	18.18	0.512	12.288
Dodecyltrimethylammonium chloride	112-00-5	DTXSID1026900	TOX21_AR_LUC_MDAKB2_Antagonist_10nM_R1881	Androgen Receptor Modulation,KCC8: Receptor Mediated Effects,Steroid Hormone Metabolism	Androgen Metabolic Process,Gene Expression Regulation, Steroid Hormone Nuclear Receptor	5.785	0.163	3.912
Dodecyltrimethylammonium chloride	112-00-5	DTXSID1026900	TOX21_PR_BLA_Antagonist_ratio	KCC8: Receptor Mediated Effects,Progesterone Receptor Modulation,Steroid Hormone Metabolism	Gene Expression Regulation, Steroid Hormone Nuclear Receptor,Progesterone Metabolic Process	63.289	1.781	42.744
Dodecyltrimethylammonium chloride	112-00-5	DTXSID1026900	TOX21_ERa_LUC_VM7_Antagonist_0.1nM_E2	Androgen Receptor Modulation,KCC8: Receptor Mediated Effects,Steroid Hormone Metabolism	Androgen Metabolic Process,Gene Expression Regulation, Steroid Hormone Nuclear Receptor	12.818	0.361	8.664
Dodecyltrimethylammonium chloride	112-00-5	DTXSID1026900	TOX21_ERR_Antagonist	Estrogen Metabolic Process,Estrogen-related Receptor Modulation,KCC8: Receptor Mediated Effects,Steroid Hormone Metabolism	Estrogen Metabolic Process,Gene Expression Regulation, Other Transcription Factors	5.326	0.15	3.6
Dodecyltrimethylammonium chloride	112-00-5	DTXSID1026900	TOX21_CAR_Antagonist	KCC8: Receptor Mediated Effects	Gene Expression Regulation, Xenobiotic Response	52.105	1.466	35.184
Dodecyltrimethylammonium chloride	112-00-5	DTXSID1026900	TOX21_AR_LUC_MDAKB2_Antagonist_0.5nM_R1881	Androgen Receptor Modulation,KCC8: Receptor Mediated Effects,Steroid Hormone Metabolism	Androgen Metabolic Process,Gene Expression Regulation, Steroid Hormone Nuclear Receptor	4.923	0.139	3.336
Dodecyltrimethylammonium chloride	112-00-5	DTXSID1026900	TOX21_RORg_LUC_CHO_Antagonist	KCC8: Receptor Mediated Effects	Gene Expression Regulation, Other Transcription Factors	20.506	0.577	13.848
Dodecyltrimethylammonium chloride	112-00-5	DTXSID1026900	TOX21_GR_BLA_Antagonist_ratio	Glucocorticoid Metabolic Process,Glucocorticoid Receptor Modulation,KCC8: Receptor Mediated Effects,Steroid Hormone Metabolism	Gene Expression Regulation, Steroid Hormone Nuclear Receptor,Glucocorticoid Metabolic Process	26.886	0.756	18.144
Dodecyltrimethylammonium chloride	112-00-5	DTXSID1026900	TOX21_AR_BLA_Antagonist_ratio	Androgen Receptor Modulation,KCC8: Receptor Mediated Effects,Steroid Hormone Metabolism	Androgen Metabolic Process,Gene Expression Regulation, Steroid Hormone Nuclear Receptor	13.571	0.382	9.168
Dodecyltrimethylammonium chloride	112-00-5	DTXSID1026900	ACEA_ER_80hr	Estrogen Metabolic Process,Estrogen Receptor Modulation,KCC8: Receptor Mediated Effects,Steroid Hormone Metabolism	Estrogen Metabolic Process,Gene Expression Regulation, Steroid Hormone Nuclear Receptor	2.105	0.0592	1.4208
Dodecyltrimethylammonium chloride	112-00-5	DTXSID1026900	TOX21_ERb_BLA_Antagonist_ratio	Estrogen Metabolic Process,Estrogen Receptor Modulation,KCC8: Receptor Mediated Effects,Steroid Hormone Metabolism	Estrogen Metabolic Process,Gene Expression Regulation, Steroid Hormone Nuclear Receptor	40.468	1.139	27.336
Dodecyltrimethylammonium chloride	112-00-5	DTXSID1026900	TOX21_PGC_ERR_Antagonist	Estrogen Metabolic Process,Estrogen-related Receptor Modulation,KCC8: Receptor Mediated Effects,Steroid Hormone Metabolism	Estrogen Metabolic Process,Gene Expression Regulation, Other Transcription Factors	5.781	0.163	3.912
Dodecyltrimethylammonium chloride	112-00-5	DTXSID1026900	TOX21_RAR_LUC_Antagonist	KCC8: Receptor Mediated Effects,Retinoic Acid Receptor Modulation	Gene Expression Regulation, Developmental Signaling	40.736	1.146	27.504
Dodecyltrimethylammonium chloride	112-00-5	DTXSID1026900	ACEA_AR_antagonist_80hr	Androgen Receptor Modulation,KCC8: Receptor Mediated Effects,Steroid Hormone Metabolism	Androgen Metabolic Process,Gene Expression Regulation, Steroid Hormone Nuclear Receptor	7.382	0.208	4.992
Dodecyltrimethylammonium chloride	112-00-5	DTXSID1026900	TOX21_VDR_BLA_antagonist_ratio	KCC8: Receptor Mediated Effects,Vitamin D Modulation	Gene Expression Regulation, Steroid Hormone Nuclear Receptor	58.579	1.648	39.552
Dodecyltrimethylammonium chloride	112-00-5	DTXSID1026900	OT_AR_ARSRC1_0480	Androgen Receptor Modulation,KCC8: Receptor Mediated Effects,Steroid Hormone Metabolism	Androgen Metabolic Process,Gene Expression Regulation, Steroid Hormone Nuclear Receptor	22.262	0.626	15.024
Dodecyltrimethylammonium chloride	112-00-5	DTXSID1026900	TOX21_PPARd_BLA_antagonist_ratio	KCC8: Receptor Mediated Effects	Gene Expression Regulation, Fatty Acid Signaling	66.225	1.863	44.712
Dodecyltrimethylammonium chloride	112-00-5	DTXSID1026900	OT_AR_ARSRC1_0960	Androgen Receptor Modulation,KCC8: Receptor Mediated Effects,Steroid Hormone Metabolism	Androgen Metabolic Process,Gene Expression Regulation, Steroid Hormone Nuclear Receptor	20.043	0.564	13.536

## Sheet: ICE Query
######Query Description######	Activity
	null
UNION
Selected Assays
KCC8: Receptor Mediated Effects
User Chemicals added to Query
Yes
User Chemicals List
587-65-5, 112-00-5
ICE v.3.3 , Query date: 2022.03.21.15.56.00
